# Supplementary material
Source: MDPI journal article supplement (https://www.mdpi.com/2306-5710/6/3/50)
Supplement: s1 [file s1]

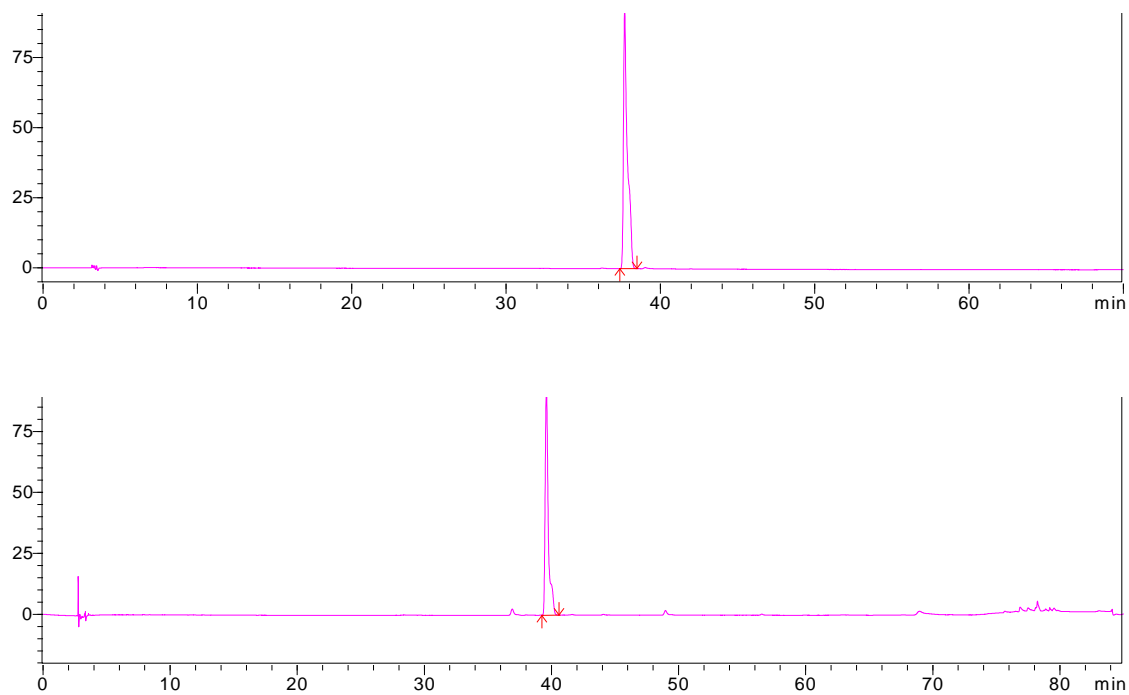

**Figure S1:** Chromatograms recorded as 280 nm, of narirutin (upper figure) and hesperidin (lower figure) standards. Both compounds were dissolved in HPLC-grade methanol at  $50 \mu\text{g mL}^{-1}$ .
